# Supplementary material for: Effects of butyrate on intestinal ischemia-reperfusion injury via the HMGB1-TLR4-MyD88 signaling pathway
Source: publisher site journal article supplement (doi:10.18632/aging.205797), 2024-05-03
Supplement: Supplementary file [file aging-v16i9-205797-supplementary-material-SD1.pdf]

## SUPPLEMENTARY FIGURE

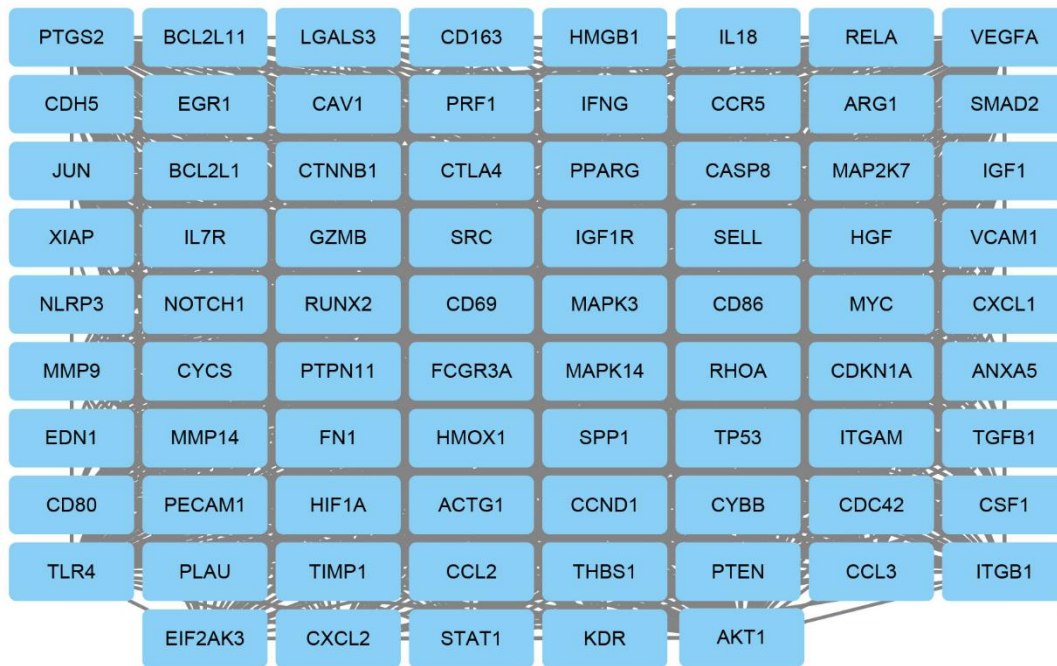

Supplementary Figure 1. PPIs network of potential key genes.
